# Supplementary material for: Mechanism of a novel metal-free carbonic anhydrase
Source: Royal Society of Chemistry journal article supplement (doi:10.1039/d4cp03099k), 2024-01-01
Supplement: d4cp03099k1.zip [file d4cp03099k1.zip]

# Mechanism of a Novel Metal-Free Carbonic Anhydrase

Shalini Yadav<sup>#</sup>, Surajit Kalita<sup>##</sup> and Kshatresh Dutta Dubey<sup>\*</sup>

Department of Chemistry, School of Natural Sciences, Shiv Nadar Institution of Eminence, Dadri,  
Gautam Buddha Nagar, Uttar Pradesh, 201314, India.

Email: [kshatresh.dubey@snu.edu.in](mailto:kshatresh.dubey@snu.edu.in) and [surajit.kalita12@gmail.com](mailto:surajit.kalita12@gmail.com)

## Table of Contents

|                                                                                                          |                |
|----------------------------------------------------------------------------------------------------------|----------------|
| <b>Figure S1:</b> Depiction of bipolar nature of enzyme active site for all2909                          | <b>S2</b>      |
| <b>S.1.</b> Adaptive Molecular Dynamics Simulation Methodology                                           | <b>S2-S3</b>   |
| <b>Figure S2:</b> Representative MD snapshots and corresponding RMSD plots                               | <b>S3</b>      |
| <b>S.2.</b> Water Assisted CO <sub>2</sub> Hydration                                                     | <b>S4</b>      |
| <b>Figure S3:</b> Scheme for water assisted CO <sub>2</sub> hydration and corresponding reaction profile | <b>S4</b>      |
| <b>Figure S4:</b> Proposed schematic pathways for CO <sub>2</sub> hydration                              | <b>S5</b>      |
| <b>Figure S5:</b> Occupancy plots of potential proton acceptor amino acids                               | <b>S5</b>      |
| <b>Figure S6:</b> Radial distribution plot for amino acid around 5 Å from CO <sub>2</sub> molecule       | <b>S6</b>      |
| <b>S.3.</b> Search of well-known proton acceptor residues                                                | <b>S6-S8</b>   |
| <b>Figure S7:</b> QM/MM optimized snapshots and the distance plots                                       | <b>S6</b>      |
| <b>Figure S8:</b> QM/MM explored CO <sub>2</sub> hydration with His598                                   | <b>S7</b>      |
| <b>Figure S9:</b> QM/MM explored CO <sub>2</sub> hydration with Glu498                                   | <b>S8</b>      |
| <b>Figure S10:</b> Radial distribution function between Tyr476 and water                                 | <b>S9</b>      |
| <b>Figure S11:</b> QM/MM optimized MD snapshots and corresponding energy profile diagram                 | <b>S9</b>      |
| QM coordinates of QM/MM Optimized geometries                                                             | <b>S10-S13</b> |

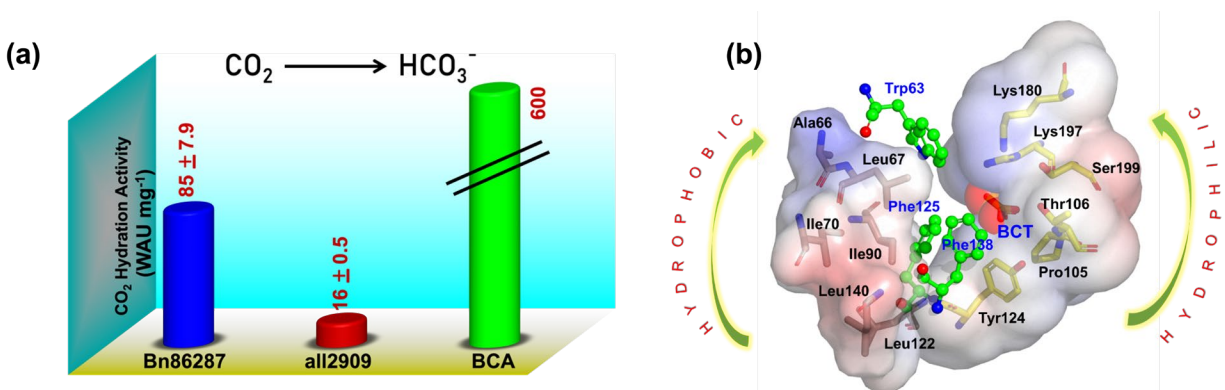

**Figure S1:** (a) Catalytic activity of CO<sub>2</sub> hydration compared between metal-free CA Bn86287, all2909 and metal dependent bovine carbonic anhydrase. (b) Bipolar nature of the enzyme active site for all2909 (PDB id: 7C5V).

Note that Wilbur-Anderson unit (WUA) is specifically used to measure the activity of carbonic anhydrase enzyme. It is defined as given below:

$$\text{WUA} = (t_0/t) - 1$$

Where,  $t_0$  and  $t$  refer to the time taken in the absence and presence of the enzyme, respectively. Higher WUA values directly indicate high activity of the enzyme carbonic anhydrase (CA), reflecting a high turnover number ( $k_{\text{cat}}$ ) and high efficiency.

### S.1. Adaptive Molecular Dynamics Simulation Methodology:

To ensure the efficient catalysis in metal free CA enzyme, the exact entrapment zone of tiny CO<sub>2</sub> substrate is important. To explore the feasible route for CO<sub>2</sub> movement, we employed adaptive steered molecular dynamics (ASMD) simulations. For doing so, following the equilibration phase, a pulling force was employed in a predetermined direction and conducted 20 iterative simulations of ASMD. This force was generated by connecting a spring between the center of mass, represented by the 'C' atom of CO<sub>2</sub>, and a designated 'OG' atom of Ser586, which were present at the distance of ~3 Å. For doing so we have used a pulling spring force constant ( $f_0$ ) 10 kcal/mol/Å<sup>2</sup> with a speed of 1 Å/ns for 320 ns to facilitate the movement of the CO<sub>2</sub> molecule from the hydrophilic zone to the hydrophobic zone. We conducted adaptive steering in 16 stages, progressing along the reaction coordinate from 3 Å to 19 Å up to 320 ns. The process continued

until the substrate CO<sub>2</sub> was completely outside of the hydrophilic zone. Finally, we calculated the potential mean force (PMF), from entire 320 ns of simulation which characterizes the free energy change along a reaction coordinate during different intermediate stages of a CO<sub>2</sub> transition using the Jarzynski's equation.

$$\langle \exp(-\beta W) \rangle = \exp(-\beta \Delta G)$$

In the above equation,  $\langle \rangle$  denotes the ensemble average,  $\beta = (k_B T)^{-1}$  ( $k_B$  is Boltzmann constant and  $T$  is temperature; here 300K),  $W$  is the work done on the system during a non-equilibrium process, and  $\Delta G$  is the difference in free energy between two equilibrium states of the system.

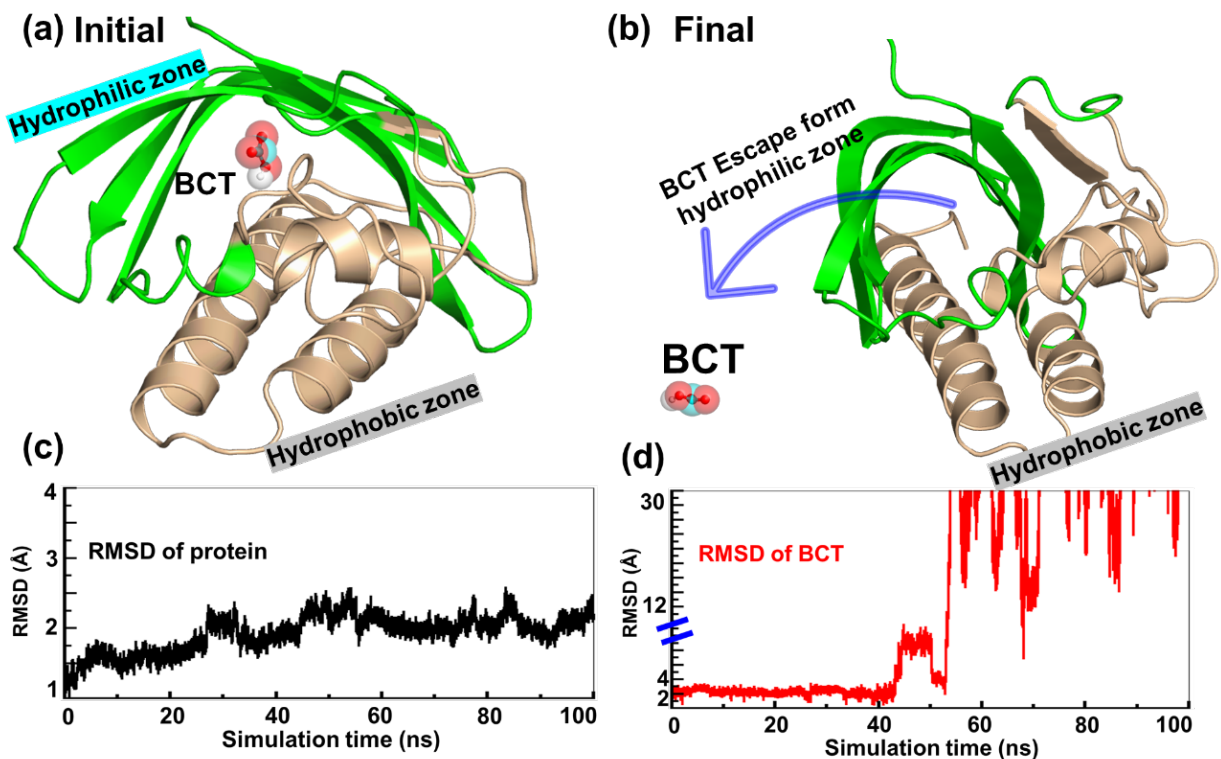

**Figure S2:** Displaying the outcomes of the MD simulation with HCO<sub>3</sub><sup>-</sup> (BCT) in the hydrophilic zone. Figures a and b reveal that there is no transfer of the HCO<sub>3</sub><sup>-</sup> group from the hydrophilic to the hydrophobic region. Instead, it moves away from the hydrophobic cavity after 40 ns of simulation. Figures c and d illustrate the RMSD pattern of the enzyme simulation and the movement of the BCT molecule as it moves away.

## S.2. Water Assisted CO<sub>2</sub> Hydration:

As noted in the prior section, the availability of water in the hydrophobic zone is a clearly observable occurrence. Previous research has shown that water facilitates CO<sub>2</sub> hydration, showing that it is a water-mediated process. To check the feasibility of CO<sub>2</sub> conversion to bicarbonate, we first performed DFT-only calculations with CO<sub>2</sub> and two water molecules in the gas phase. Calculation shows a TS barrier of just 21.6 kcal/mol and in a concerted way to form the carbonic acid (H<sub>2</sub>CO<sub>3</sub>) as a product. Calculation shows the CO<sub>2</sub> gets hydrated to in a concerted manner to form H<sub>2</sub>CO<sub>3</sub> (carbonic acid) as a product with a TS barrier of just 21.6 kcal/mol (cf. Figure S1).

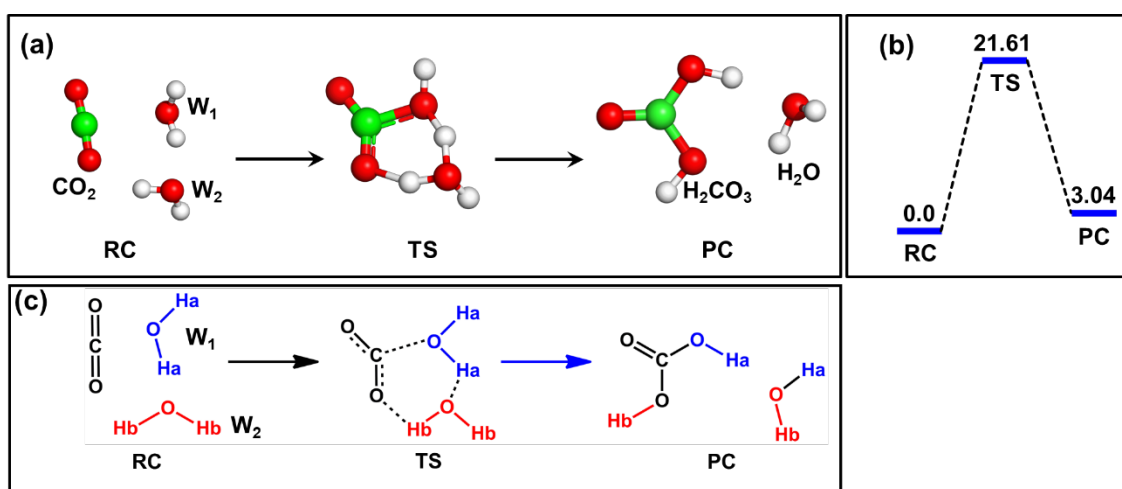

**Figure S3:** (a) Ball and stick representation of the species involved in the concerted conversion of carbon dioxide into carbonic acid. (b) Gas-phase energy profile diagram for the interconversion of carbon dioxide (RC) into carbonic acid (PC) calculated at the B3LYP/def2-SVP level of theory. Note that energies were further corrected by dispersion correction and zero-point energy correction. The energies are reported in kcal/mol. (c) Concerted mechanism of CO<sub>2</sub> hydration via two water molecules.

By employing two water molecules during the process of CO<sub>2</sub> hydration, we successfully generated H<sub>2</sub>CO<sub>3</sub>, also known as carbonic acid. This formation, occurring in the gas phase, prompted us to hypothesize the existence of a proton acceptor residue within the hydrophobic zone of the CA enzyme. This residue is expected to play a crucial role in the formation of bicarbonate (H<sub>2</sub>CO<sub>3</sub> – H<sup>+</sup> → HCO<sub>3</sub><sup>–</sup>) by accepting one of the protons involved in the CO<sub>2</sub> hydration reaction in enzymatic environment.

**(a) Stepwise Mechanism**

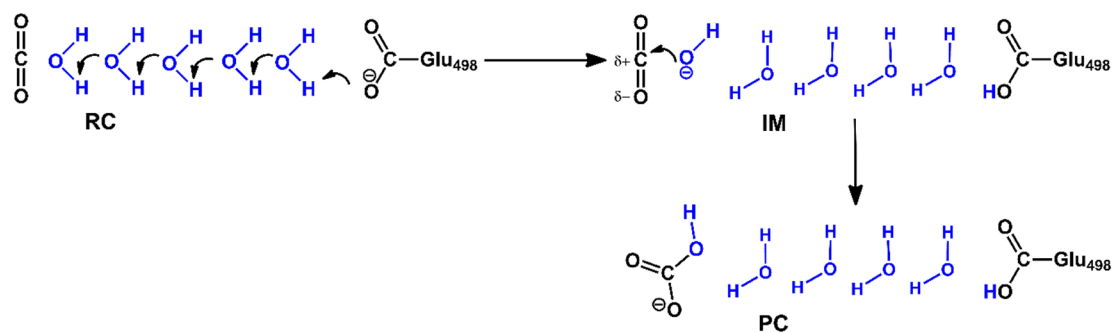

**(b) Concerted Mechanism**

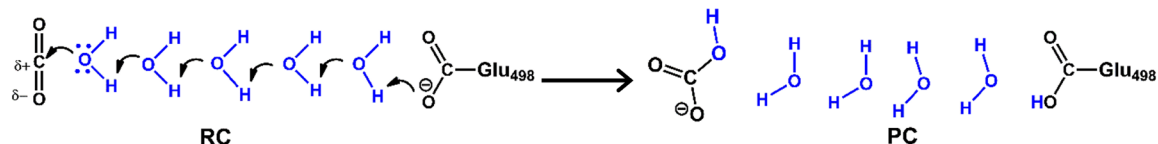

**Figure S4.** Proposed (a) stepwise and (b) concerted pathways wherein Glutamic acid residue acts as a proton acceptor.

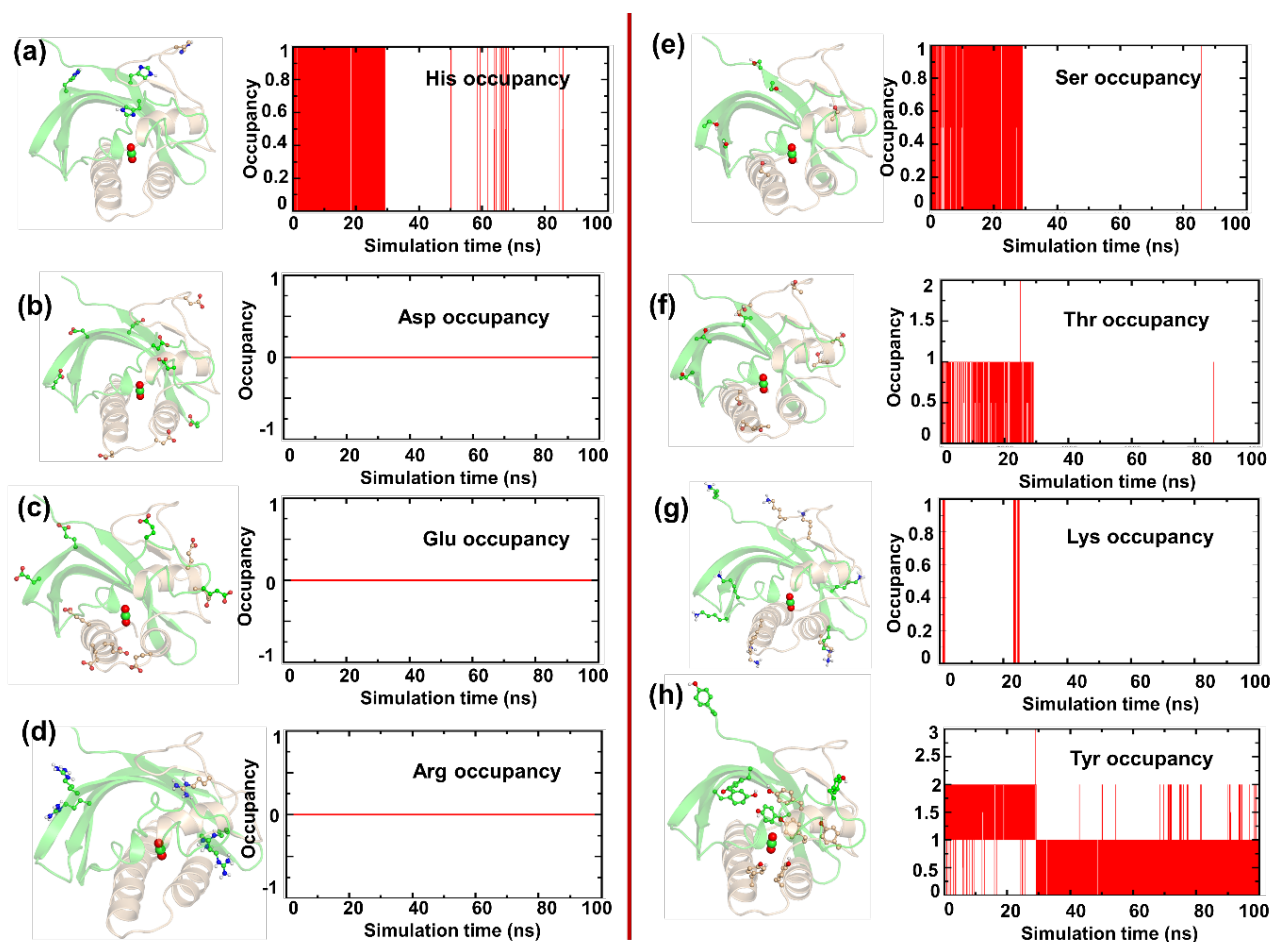

**Figure S5:** Occupation possibility of different residues calculated near to 5 Å of CO<sub>2</sub> molecule, over the trajectory.

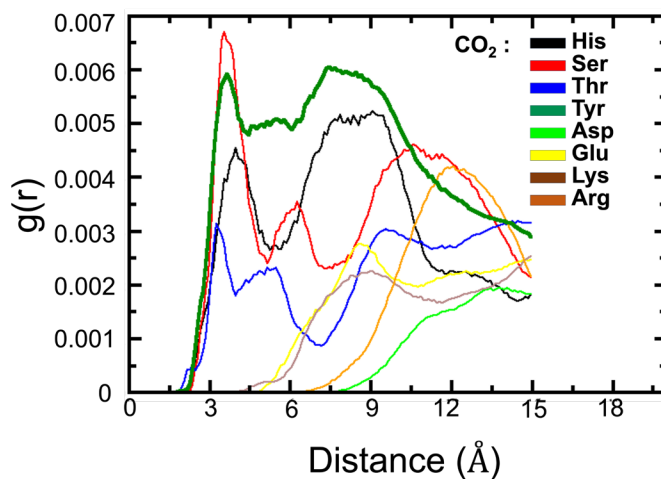

**Figure S6:** Radial distribution plot for amino acid residues present within 5 Å from CO<sub>2</sub> molecule.

### S.3. Proton Acceptor Residues

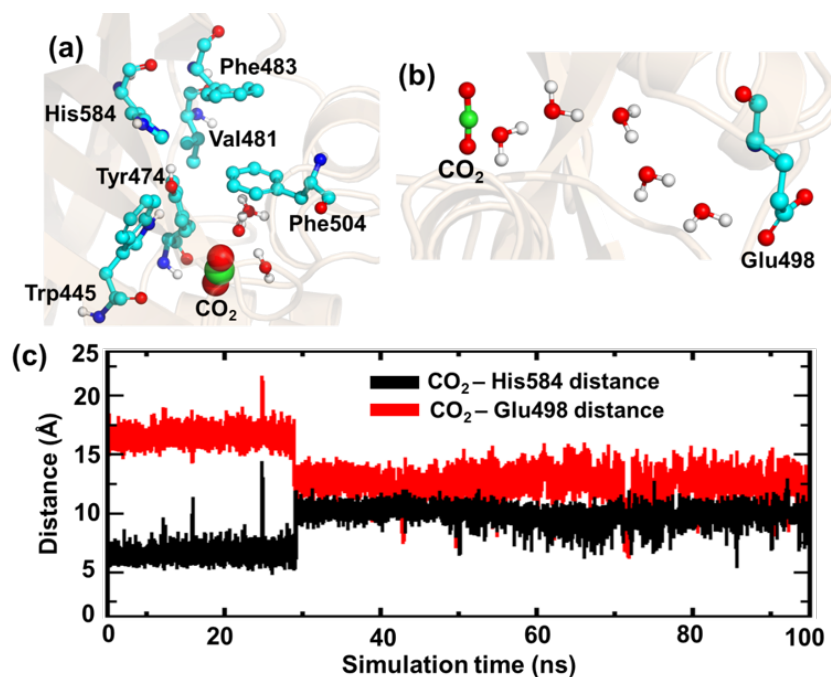

**Figure S7.** Optimized RC geometry for the proposed pathway for CO<sub>2</sub> hydration; through (a) Histidine (b) Glutamic acid. (c) Distance plot depicts the evolution of positional gap between His584, Glu498 with CO<sub>2</sub>.

### S.3.a. His584 as a Proton Acceptor Residue:

It is believed that all known metal containing CA enzymes uses histidine residue in their proton shuttle machinery and therefore, we first investigate the role of histidine in the metal independent CA enzyme. A thorough investigation of the MD trajectories reveals that the His584 is located in the hydrophilic zone, which is 8.1 Å away from the CO<sub>2</sub> and sterically hindered by bulky residues. The detailed description can be seen in Figure S5b. In such case, it is almost impossible to abstract a proton by His584 residue from a water molecule that is present nearby CO<sub>2</sub> and therefore, we reject the hypothesis of bicarbonate formation in a concerted way. Thereafter, we attempt to test the stepwise pathway as shown in Figure S6. In this case, two water molecules simultaneously react with the CO<sub>2</sub> molecule, which generates the carbonic acid at a cost of 12.7 kcal/mol energy. Since carbonic acid is an acid molecule, it has a natural tendency to donate its proton to the surroundings. Then, the proton from the carbonic acid is received by the nearby water molecule (W2) and attains the stability by interacting with the adjacent hydroxyl group of the tyrosine residue. Thereafter, the Tyr474 residue relays this additional proton of the water molecule to the nearby His584 residue. Although we obtain a feasible process in our QM/MM derived potential energy surface, the energy cost for the second step of the reaction is very high (>32.9 kcal/mol). Thus, we believe that there must be an alternating low energetic reaction pathway for the efficient catalysis of hydration CO<sub>2</sub> molecule.

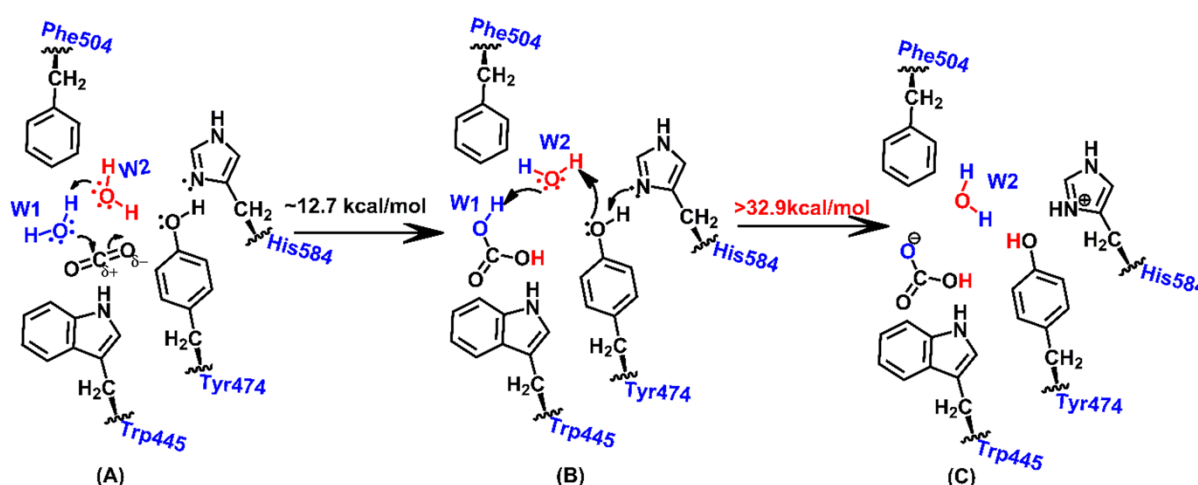

**Figure S8.** Reaction scheme for CO<sub>2</sub> hydration observed when His acted as a base.

### S.3.b. Glu498 as a Proton Acceptor Residue:



Since the traditional proton acceptor, histidine residue requires very high energy to complete the catalytic cycle of the metal independent CA enzyme, we concentrate on the Glu498 as a proton acceptor. As can be seen in Figure S5b, Glu498 residue organizes a water channel connecting to the substrate CO<sub>2</sub> molecule, however the distance between them is very large, which is ~13 Å (cf. S5c).

**(a) Stepwise Mechanism**

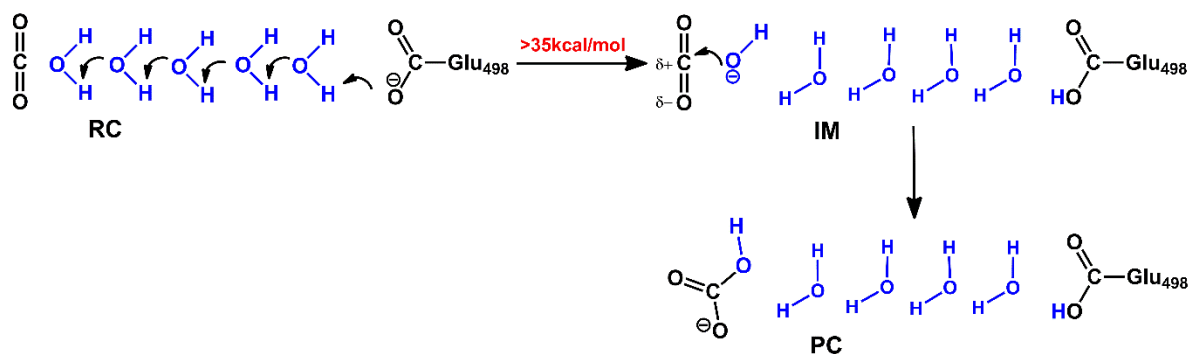

**(b) Concerted Mechanism**

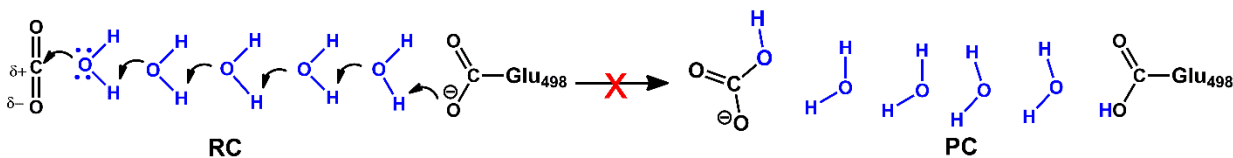

**Figure S9.** QM/MM explored CO<sub>2</sub> hydration with proton acceptor residue Glu498. We have tested both (a) stepwise and (b) concerted pathways wherein Glutamic acid residue acts as a proton acceptor. However, due to a larger distance between substrate CO<sub>2</sub> and Glu498 (~13.8 Å) the process was not feasible.

Albeit the long distance between the reactive molecules, we have carried out the QM/MM potential energy surface scanning to achieve the product, bicarbonate molecule according to Grotthuss mechanism. Unfortunately, we cannot generate a stable product on the potential energy surface with the help of Glu498 residue. Hence, we reject the idea of Glu498 residue, acting as a proton acceptor residue and further proceeded for the only possibility where Tyr46 acts as a base. (Section 3.7)



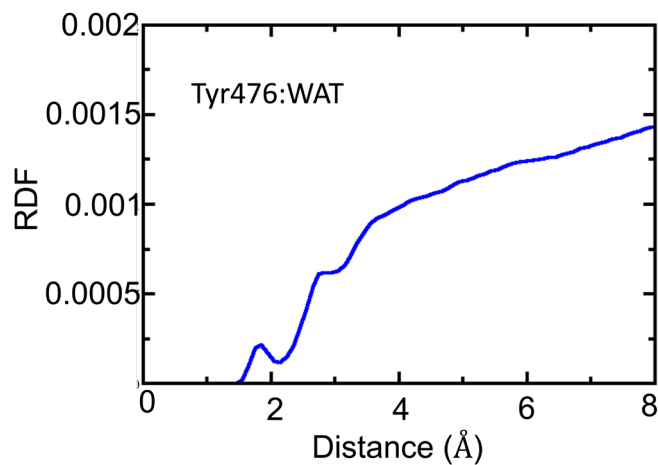

**Figure S10:** Radial distribution function calculated between residue Tyr476 and water molecules.

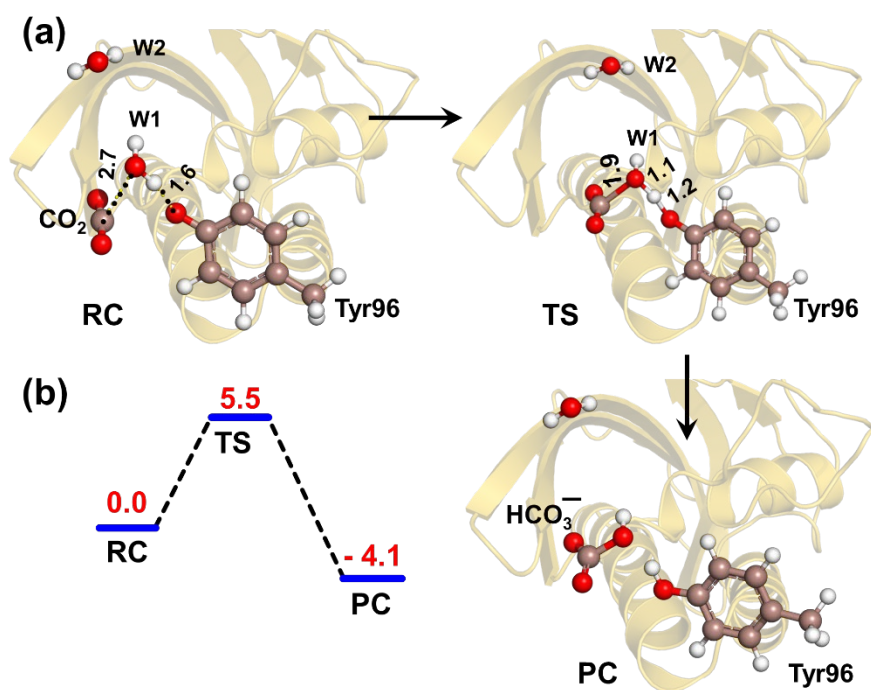

**Figure S11:** QM/MM optimized geometries involved in the conversion of CO<sub>2</sub> into bicarbonate for all2909. All Energies are in kcal/mol and calculated at B3LYP-D3/def2-TZVP/ZPE level of theory.

**QM Coordinates of optimized geometries  
in GAS phase**

**RC**

|   |             |             |             |
|---|-------------|-------------|-------------|
| C | -1.29111200 | -0.45204100 | -0.00860800 |
| O | -2.21512800 | 0.23982000  | 0.09778400  |
| O | -0.42675400 | -1.23328800 | -0.10356900 |
| O | 2.39592200  | -0.42072400 | 0.17511700  |
| H | 2.79136500  | -0.59455200 | -0.69094200 |
| H | 1.60561600  | -0.98548700 | 0.18471700  |
| O | 0.45415400  | 1.55196300  | -0.16996800 |
| H | 1.27783800  | 1.04281500  | -0.02649200 |
| H | 0.40630800  | 2.14731000  | 0.58945900  |

**TS**

|   |             |             |             |
|---|-------------|-------------|-------------|
| C | 0.83978300  | -0.20591300 | 0.02307600  |
| O | 2.00142900  | 0.02947000  | -0.09418400 |
| O | 0.07074800  | -1.17770000 | 0.08356400  |
| O | -2.06813000 | -0.04254100 | -0.17966800 |
| H | -2.57247700 | -0.06606200 | 0.64787200  |
| H | -1.28143500 | -0.76899100 | -0.07970800 |
| O | -0.05281300 | 1.11895700  | 0.14267300  |
| H | -1.21978900 | 0.77736500  | -0.08211200 |
| H | 0.42513500  | 1.86768200  | -0.24358900 |

**PC**

|   |             |             |             |
|---|-------------|-------------|-------------|
| C | -0.87644700 | 0.07903200  | 0.00047300  |
| O | -2.07373700 | 0.11410800  | 0.03855600  |
| O | -0.07009500 | 1.11949600  | -0.02769200 |
| O | 2.37844500  | 0.03268300  | -0.07119500 |
| H | 2.80018400  | 0.03934500  | 0.80015000  |
| H | 0.88369900  | 0.83893400  | -0.06514800 |
| O | -0.17374900 | -1.10554800 | -0.01595700 |
| H | 1.92714800  | -0.82706900 | -0.11963500 |
| H | -0.83926800 | -1.81131800 | -0.00789900 |

**Coordinates of QM/MM optimized  
geometries for CO<sub>2</sub> hydration in the  
Bn86287:**

**RC<sub>Bn86287</sub>**

|   |            |            |            |
|---|------------|------------|------------|
| C | 18.6988180 | 30.0411569 | 34.9654670 |
| H | 18.5010893 | 29.0368978 | 34.5700140 |
| H | 17.8017311 | 30.6489858 | 34.7495337 |
| C | 19.9423590 | 30.6044884 | 34.3140012 |
| C | 20.3145099 | 31.9641602 | 34.4145558 |
| H | 19.6670780 | 32.6517891 | 34.9749899 |
| C | 21.4637626 | 32.4672324 | 33.8170682 |
| H | 21.7087085 | 33.5291472 | 33.8817239 |
| C | 22.3720413 | 31.6321071 | 33.0646619 |
| O | 23.4537269 | 32.0692881 | 32.5480116 |
| C | 21.9378013 | 30.2645446 | 32.9379413 |
| H | 22.5717288 | 29.6049892 | 32.3437637 |

|   |            |            |            |
|---|------------|------------|------------|
| C | 20.7834455 | 29.7800083 | 33.5475970 |
| H | 20.5190047 | 28.7241496 | 33.4083899 |
| C | 27.5278251 | 27.0295902 | 28.5456559 |
| O | 26.9187456 | 26.2855740 | 29.2060092 |
| O | 28.2761086 | 27.6906507 | 27.9468858 |
| O | 24.1773411 | 30.5602537 | 30.5534907 |
| H | 23.2684592 | 30.4919104 | 30.1818668 |
| H | 24.0310510 | 31.1519219 | 31.3687001 |
| O | 26.0432962 | 29.3880273 | 29.1866863 |
| H | 25.3307017 | 29.7578953 | 29.7994434 |
| H | 26.4045735 | 30.2021383 | 28.8016016 |
| O | 25.4783498 | 27.7194059 | 27.1044035 |
| H | 25.5284490 | 28.4005658 | 27.8210692 |
| H | 24.7281470 | 27.1568836 | 27.3633833 |
| H | 18.7862149 | 29.9267001 | 36.0458968 |

**TS<sub>Bn86287</sub>**

|   |            |            |            |
|---|------------|------------|------------|
| C | 18.7171848 | 30.0277458 | 34.9568998 |
| H | 18.5480799 | 29.0160416 | 34.5682963 |
| H | 17.8095198 | 30.6127767 | 34.7254359 |
| C | 19.9492977 | 30.6184245 | 34.3035332 |
| C | 20.2741289 | 31.9917870 | 34.3844202 |
| H | 19.6161708 | 32.6599376 | 34.9548314 |
| C | 21.3835102 | 32.5337628 | 33.7475380 |
| H | 21.5895859 | 33.6050383 | 33.7955892 |
| C | 22.2847976 | 31.7295259 | 32.9604245 |
| O | 23.3058259 | 32.2177908 | 32.3609304 |
| C | 21.9268732 | 30.3405362 | 32.8885819 |
| H | 22.5821849 | 29.6942943 | 32.3007258 |
| C | 20.8085302 | 29.8147104 | 33.5367617 |
| H | 20.5881332 | 28.7459419 | 33.4237672 |

|   |            |            |            |
|---|------------|------------|------------|
| C | 27.1241073 | 27.1168020 | 28.3413898 |
| O | 26.8587307 | 25.9599458 | 28.5668293 |
| O | 28.0121594 | 27.9282061 | 28.3712191 |
| O | 23.7532200 | 31.1317529 | 30.1320979 |
| H | 22.8333052 | 30.8067464 | 29.9572521 |
| H | 23.6722716 | 31.5658831 | 31.0840844 |
| O | 25.5892038 | 29.7312715 | 29.3300434 |
| H | 24.7406575 | 30.3004051 | 29.7170979 |
| H | 26.2189277 | 30.3947427 | 29.0056379 |
| O | 25.7329115 | 27.8972727 | 27.7710586 |
| H | 25.5704518 | 28.8117191 | 28.5063422 |
| H | 25.0004677 | 27.2573908 | 27.8137575 |
| H | 18.7942178 | 29.9227082 | 36.0390737 |

**PC<sub>Bn86287</sub>**

|   |            |            |            |
|---|------------|------------|------------|
| C | 18.7301300 | 29.9793935 | 34.9436103 |
| H | 18.6839767 | 28.9501745 | 34.5708397 |
| H | 17.7711972 | 30.4593518 | 34.6817162 |
| C | 19.8939124 | 30.7033737 | 34.2961264 |
| C | 20.0866028 | 32.0883438 | 34.4530309 |
| H | 19.4133457 | 32.6549825 | 35.1057332 |
| C | 21.0910974 | 32.7685923 | 33.7690120 |
| H | 21.2073713 | 33.8508177 | 33.8592198 |
| C | 21.9500210 | 32.0865551 | 32.8757742 |
| O | 22.8578431 | 32.7815970 | 32.1997404 |
| C | 21.7905527 | 30.6886783 | 32.7435224 |
| H | 22.4515317 | 30.1458491 | 32.0632102 |
| C | 20.7772177 | 30.0244777 | 33.4385820 |
| H | 20.6499910 | 28.9479091 | 33.2796651 |
| C | 26.2816476 | 27.0009368 | 28.8843683 |
| O | 26.7016477 | 25.9147838 | 28.4721536 |

|   |            |            |            |
|---|------------|------------|------------|
| O | 26.7212945 | 27.7835572 | 29.7501137 |
| O | 23.2912383 | 31.6418412 | 29.9456556 |
| H | 22.3600964 | 31.3491274 | 29.7741861 |
| H | 23.1319266 | 32.3017114 | 31.3448106 |
| O | 24.4919565 | 29.2666529 | 30.2671805 |
| H | 23.8250988 | 30.8051570 | 30.0110376 |
| H | 25.4451457 | 28.9980561 | 30.2817681 |
| O | 25.0670640 | 27.4652062 | 28.2779404 |
| H | 24.2339109 | 28.7114951 | 29.5068068 |
| H | 24.7094899 | 26.7199712 | 27.7695814 |
| H | 18.7986044 | 29.9019074 | 36.0286791 |

**QM/MM optimized geometry coordinates  
for CO<sub>2</sub> hydration in all2909.**

**RC<sub>all2909</sub>**

|   |            |            |            |
|---|------------|------------|------------|
| C | 43.6004588 | 35.6963375 | 27.3493724 |
| H | 43.8792510 | 34.6690817 | 27.6348313 |
| H | 44.4118691 | 36.3703328 | 27.6775102 |
| C | 42.2952413 | 36.0879409 | 28.0266204 |
| C | 41.9326455 | 37.4381574 | 28.2234768 |
| H | 42.6081125 | 38.2280313 | 27.8738031 |
| C | 40.7514568 | 37.8068809 | 28.8624361 |
| H | 40.5104524 | 38.8653943 | 29.0004916 |
| C | 39.8029396 | 36.8433059 | 29.3504292 |
| O | 38.6773532 | 37.1729946 | 29.8854140 |
| C | 40.2267521 | 35.4803253 | 29.2033013 |

|   |            |            |            |
|---|------------|------------|------------|
| H | 39.5747045 | 34.7117737 | 29.6338724 |
| C | 41.4155494 | 35.1261947 | 28.5582913 |
| H | 41.6839796 | 34.0634212 | 28.4800048 |
| C | 36.9627163 | 39.1506881 | 30.1557401 |
| O | 36.7485612 | 38.9847200 | 31.2911701 |
| O | 37.0800457 | 39.5089628 | 29.0532194 |
| O | 33.1530041 | 34.9867582 | 31.5340955 |
| H | 32.9346881 | 35.8717975 | 31.8565043 |
| H | 33.7477610 | 34.6085569 | 32.2308415 |
| O | 36.1237667 | 36.5924134 | 29.4921687 |
| H | 35.8656486 | 36.1552747 | 30.3146926 |
| H | 37.1208416 | 36.6714854 | 29.5848793 |
| H | 43.5933079 | 35.7304311 | 26.2599443 |

**TS<sub>all2909</sub>**

|   |            |            |            |
|---|------------|------------|------------|
| C | 43.6610771 | 35.6325454 | 27.3294550 |
| H | 43.8911260 | 34.5839259 | 27.5746701 |
| H | 44.5144674 | 36.2529614 | 27.6531739 |
| C | 42.4044143 | 36.0775298 | 28.0505636 |
| C | 42.1621725 | 37.4406545 | 28.3163388 |
| H | 42.8826224 | 38.1903937 | 27.9723573 |
| C | 41.0409892 | 37.8631659 | 29.0214221 |
| H | 40.8759021 | 38.9246522 | 29.2258148 |

C 40.0695136 36.9424624 29.5154990  
 O 39.0383778 37.3545815 30.1944802  
 C 40.3321899 35.5667927 29.2515868  
 H 39.6296713 34.8309550 29.6584061  
 C 41.4664970 35.1554955 28.5437017  
 H 41.6458678 34.0824829 28.3926435  
 C 36.6411794 39.0875410 30.1761669  
 O 36.3695243 39.1242306 31.3342352  
 O 36.8636325 39.5929909 29.1305876  
 O 32.8819067 35.0163691 31.7499940  
 H 32.6196498 35.8691655 32.1223446  
 H 33.5657252 34.6661442 32.3746292  
 O 36.6788755 37.1663916 29.7415801  
 H 36.3394161 36.7397357 30.5411454  
 H 37.8003892 37.1295580 29.8938321  
 H 43.6169114 35.7063276 26.2428673

**PC<sub>all2909</sub>**

C 43.6549773 35.5881201 27.3247671  
 H 43.6975859 34.5158856 27.5742382  
 H 44.6035888 36.0457081 27.6473003  
 C 42.5113060 36.2888402 28.0279360

C 42.6094264 37.6648068 28.3058704  
 H 43.5070150 38.2077404 28.0042738  
 C 41.5961600 38.3579474 28.9530851  
 H 41.6881795 39.4266839 29.1622071  
 C 40.4165291 37.6949072 29.3464401  
 O 39.4781142 38.4187867 29.9572976  
 C 40.3055225 36.3133009 29.0847922  
 H 39.3973565 35.7860325 29.3928564  
 C 41.3463760 35.6289085 28.4421073  
 H 41.2517048 34.5496919 28.2720170  
 C 36.5071580 39.0254958 30.3805672  
 O 36.1984084 39.2400896 31.5603922  
 O 36.5127450 39.6761587 29.3447219  
 O 32.8106780 35.0124517 31.8072591  
 H 32.6324728 35.9193387 32.0900145  
 H 33.5338109 34.6920753 32.4002627  
 O 36.9829576 37.6219638 30.1677137  
 H 36.8684369 37.2348012 31.0483365  
 H 38.5892155 37.9686054 30.0090439  
 H 43.6117826 35.6813701 26.2396377
